# Supplementary material
Source: publisher figshare collection journal article supplement (https://karger.figshare.com/articles/dataset/_/5123821)
Supplement: Supplementary file 1 [file 1]

# Supplemental Figure 1

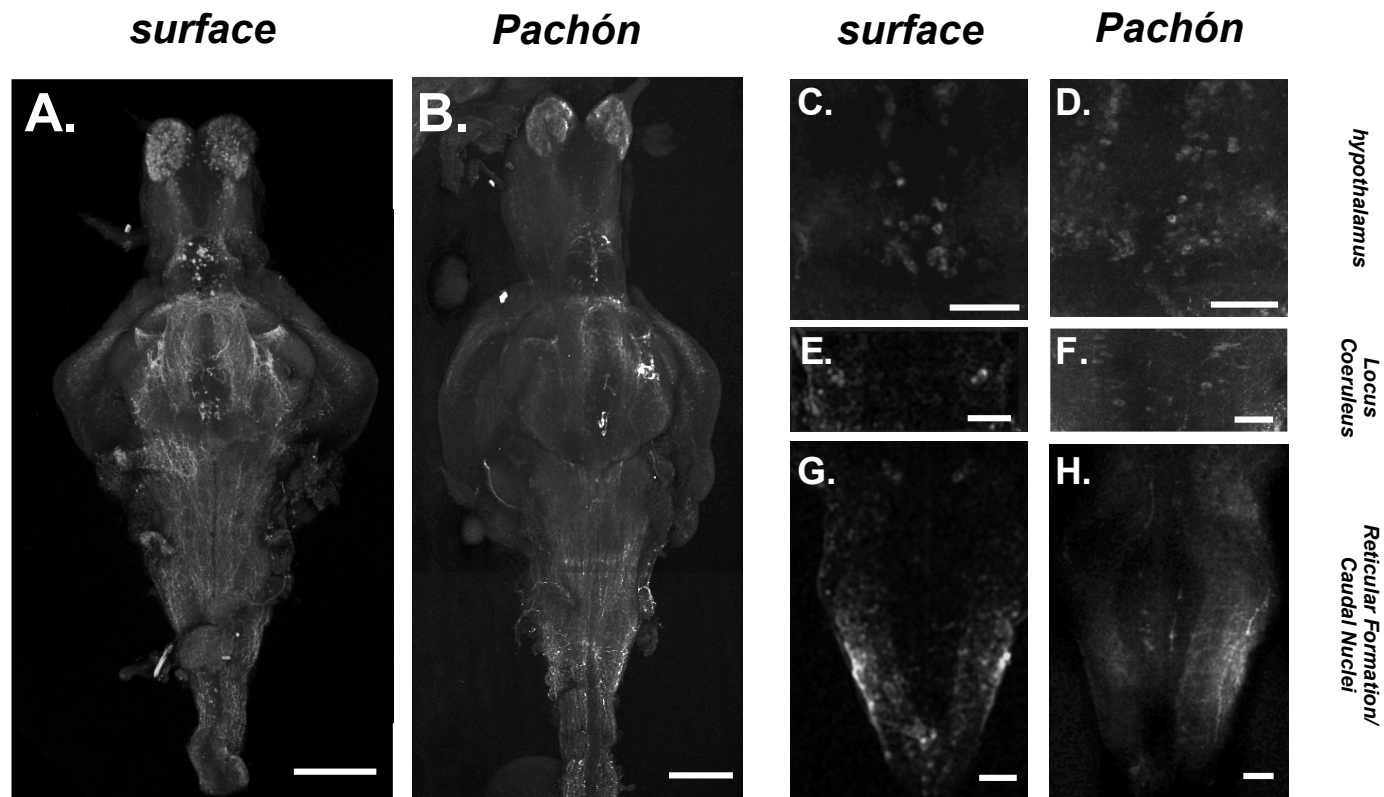

**Supplemental Figure 1. Tyrosine Hydroxylase expression in 22 dpf surface and cavefish. A, B.** Whole mount projection of 22 dpf surface (A) and cavefish (B) brains stained with anti-TH alongside. Scale bars represent 200  $\mu$ M **C-H.** Single 1.5  $\mu$ M sections were used to quantify the number of TH-positive cells within surface (**C**, **E**, and **G**) and cavefish brains (**D**, **F**, and **H**). **C** and **D** depict the hypothalamus, **E** and **F** depict locus coeruleus, and **G** and **H** depict the reticular formation and caudal nuclei. Scale bars represent 50 $\mu$ M.
